# Supplementary figures and images for: Therapy-Induced Senescence Enhances the Efficacy of HER2-Targeted Antibody–Drug Conjugates in Breast Cancer
Source: PubMed Central journal article supplement — Cancer Res. 2022 Oct 12;82(24):4670–9. doi: 10.1158/0008-5472.CAN-22-0787 (PMC9755966; doi:10.1158/0008-5472.can-22-0787), 2022-10-12

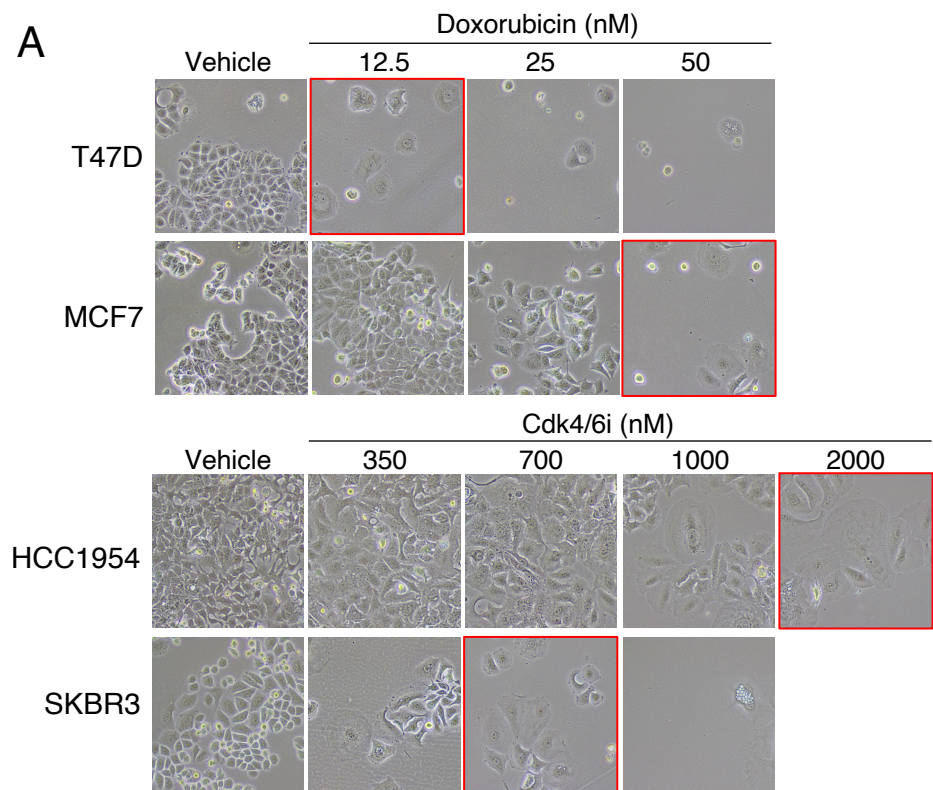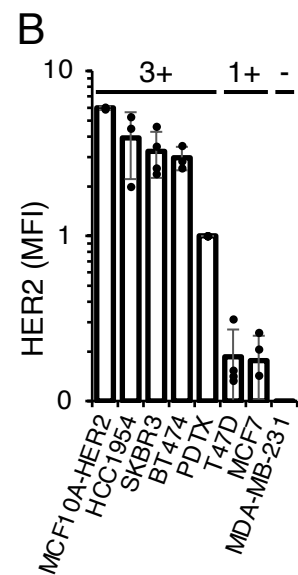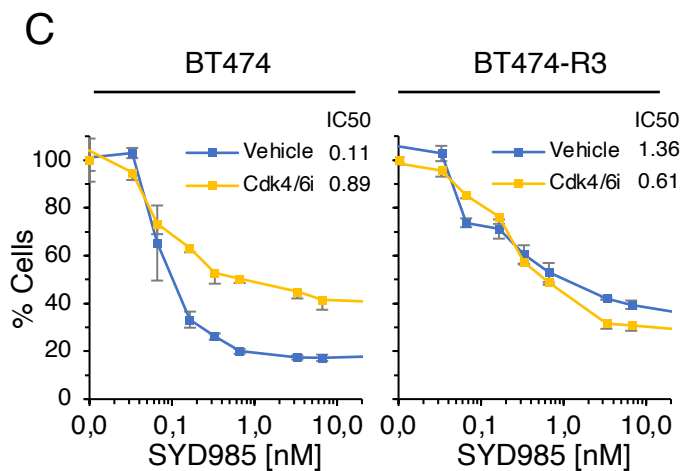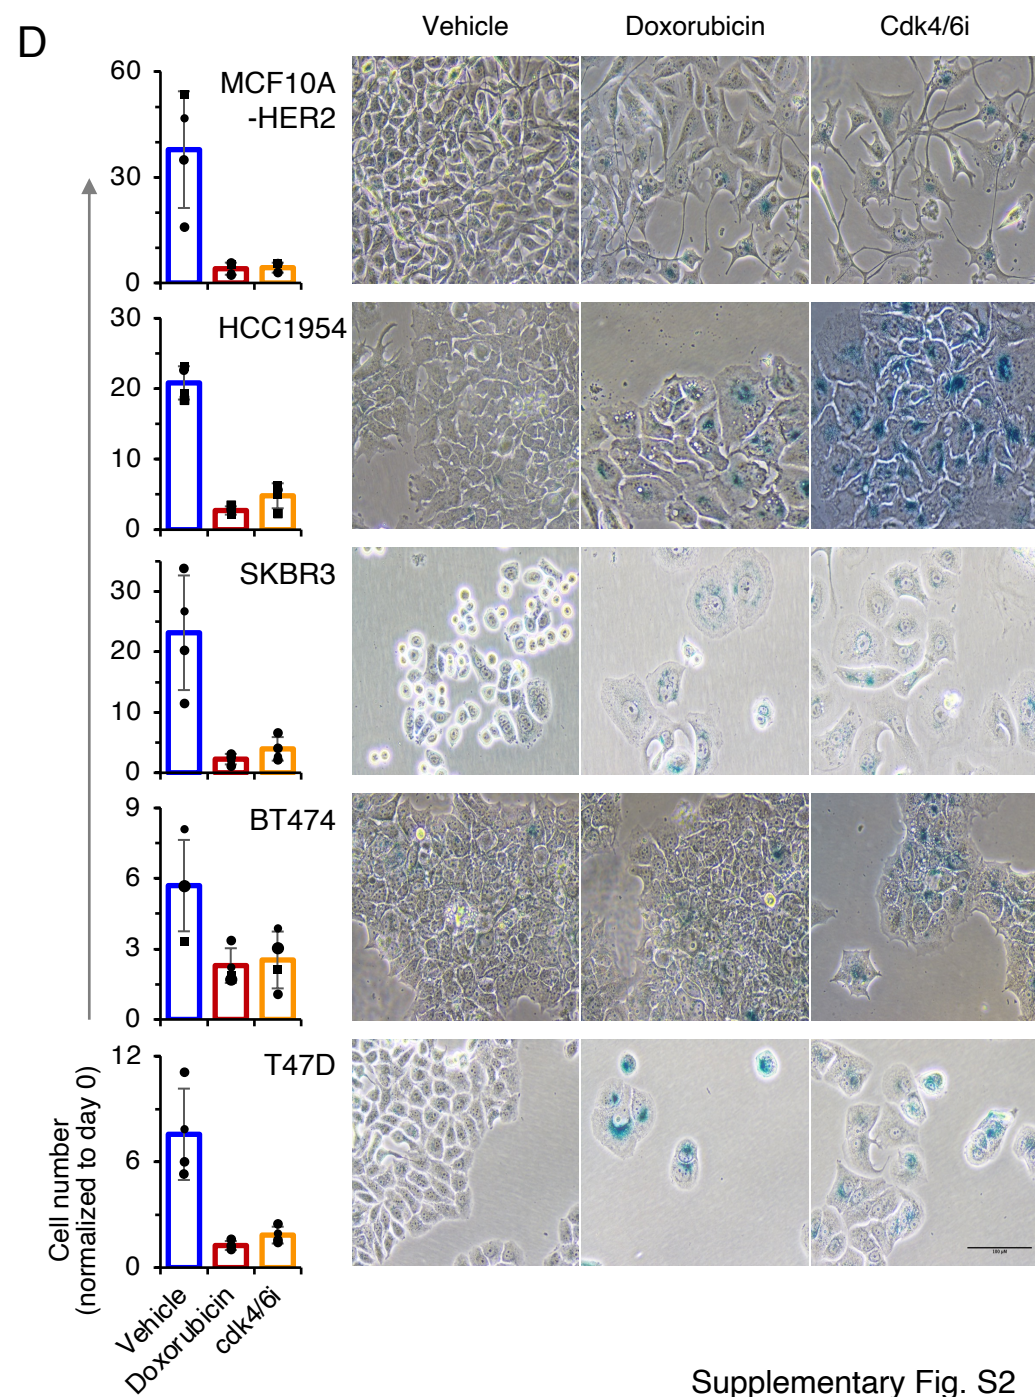

Supplement: can-22-0787_supplementary_figure_s2_suppsf2.pdf [file can-22-0787_supplementary_figure_s2_suppsf2.pdf]

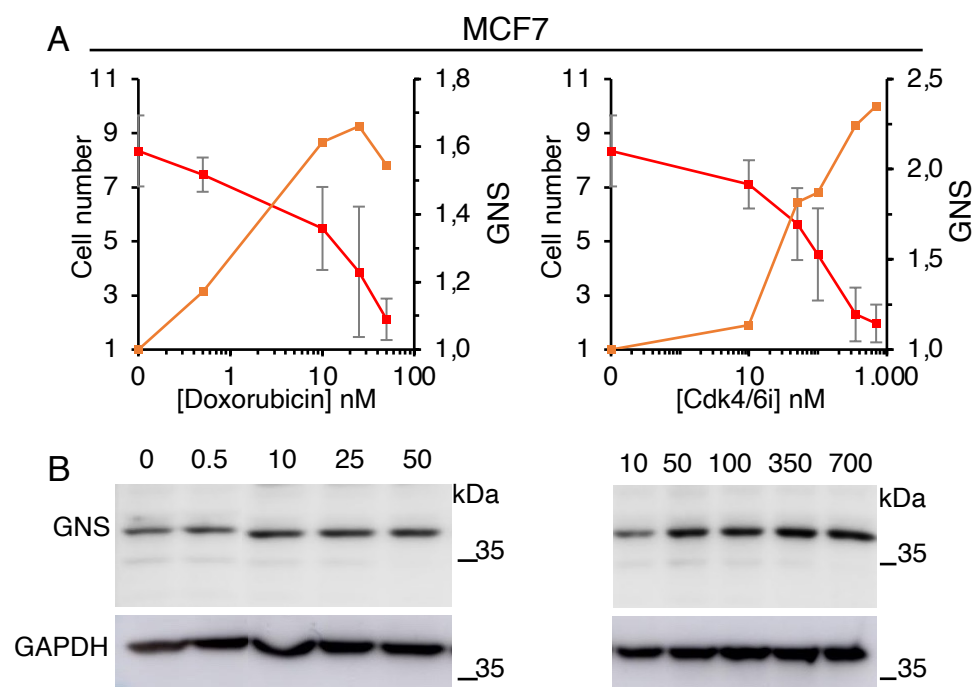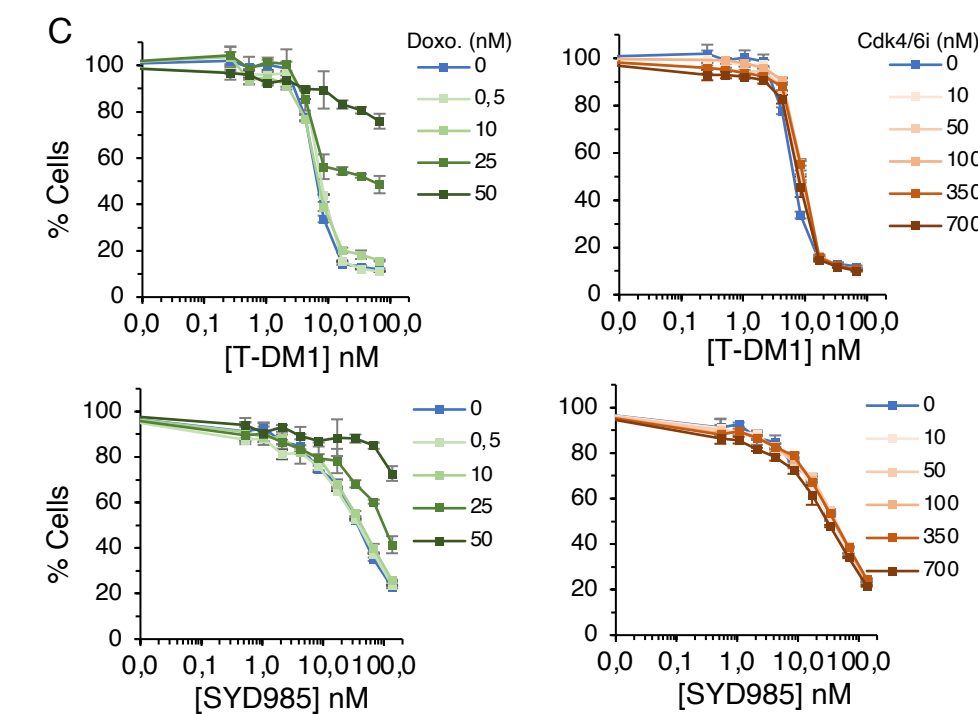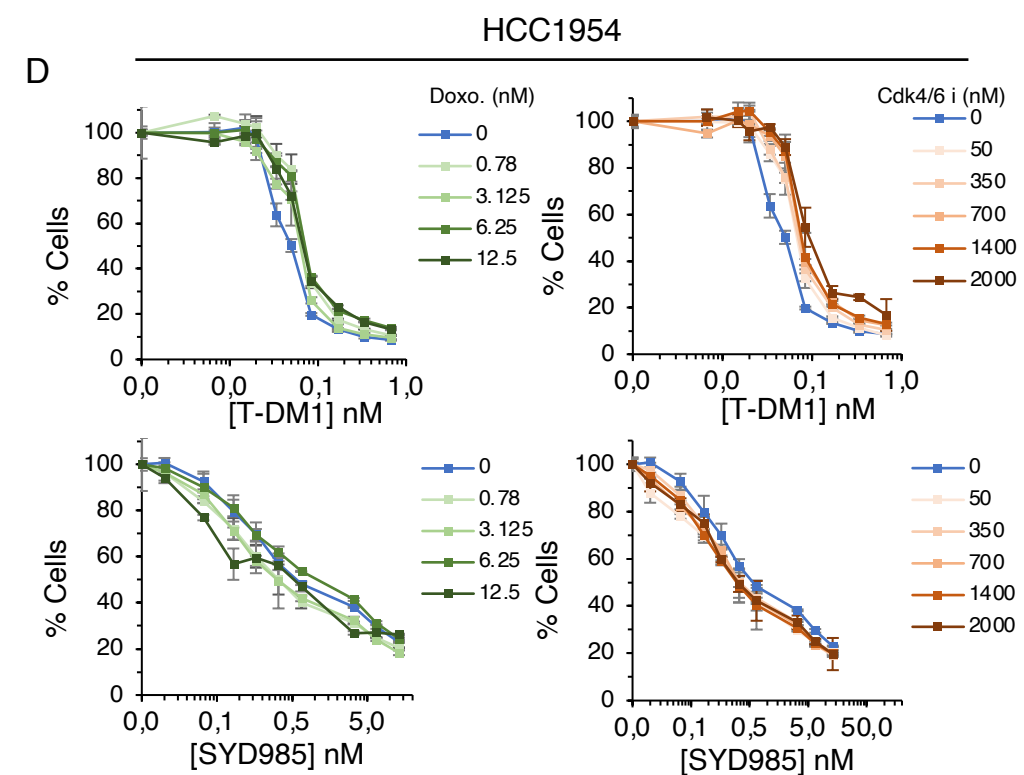

Supplement: can-22-0787_supplementary_figure_s3_suppsf3.pdf [file can-22-0787_supplementary_figure_s3_suppsf3.pdf]

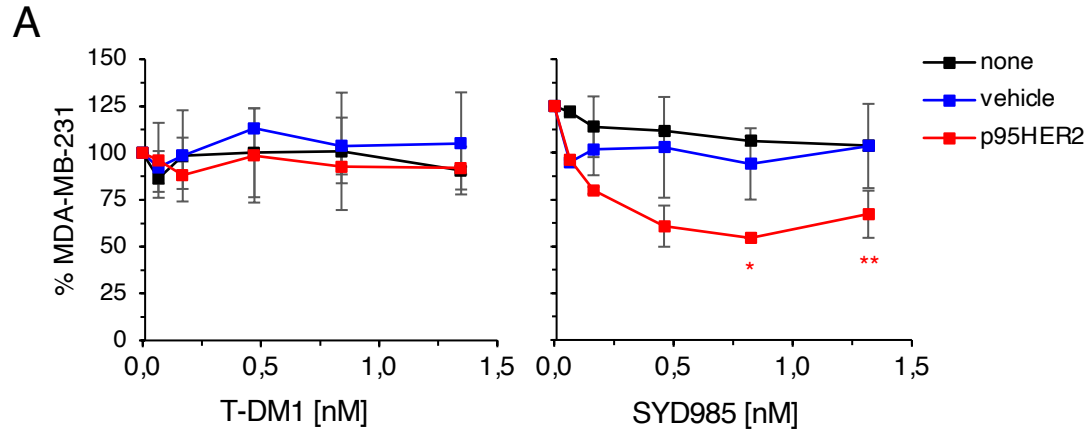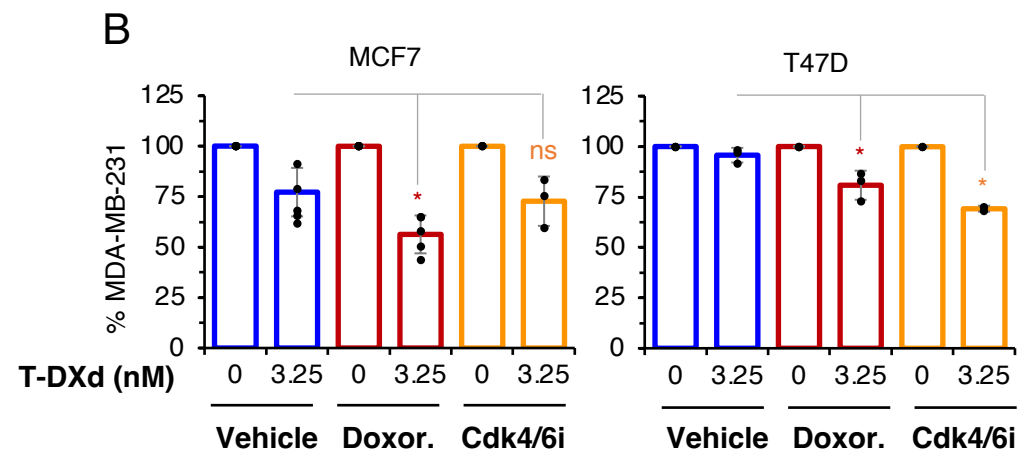

Supplement: can-22-0787_supplementary_figure_s4_suppsf4.pdf [file can-22-0787_supplementary_figure_s4_suppsf4.pdf]

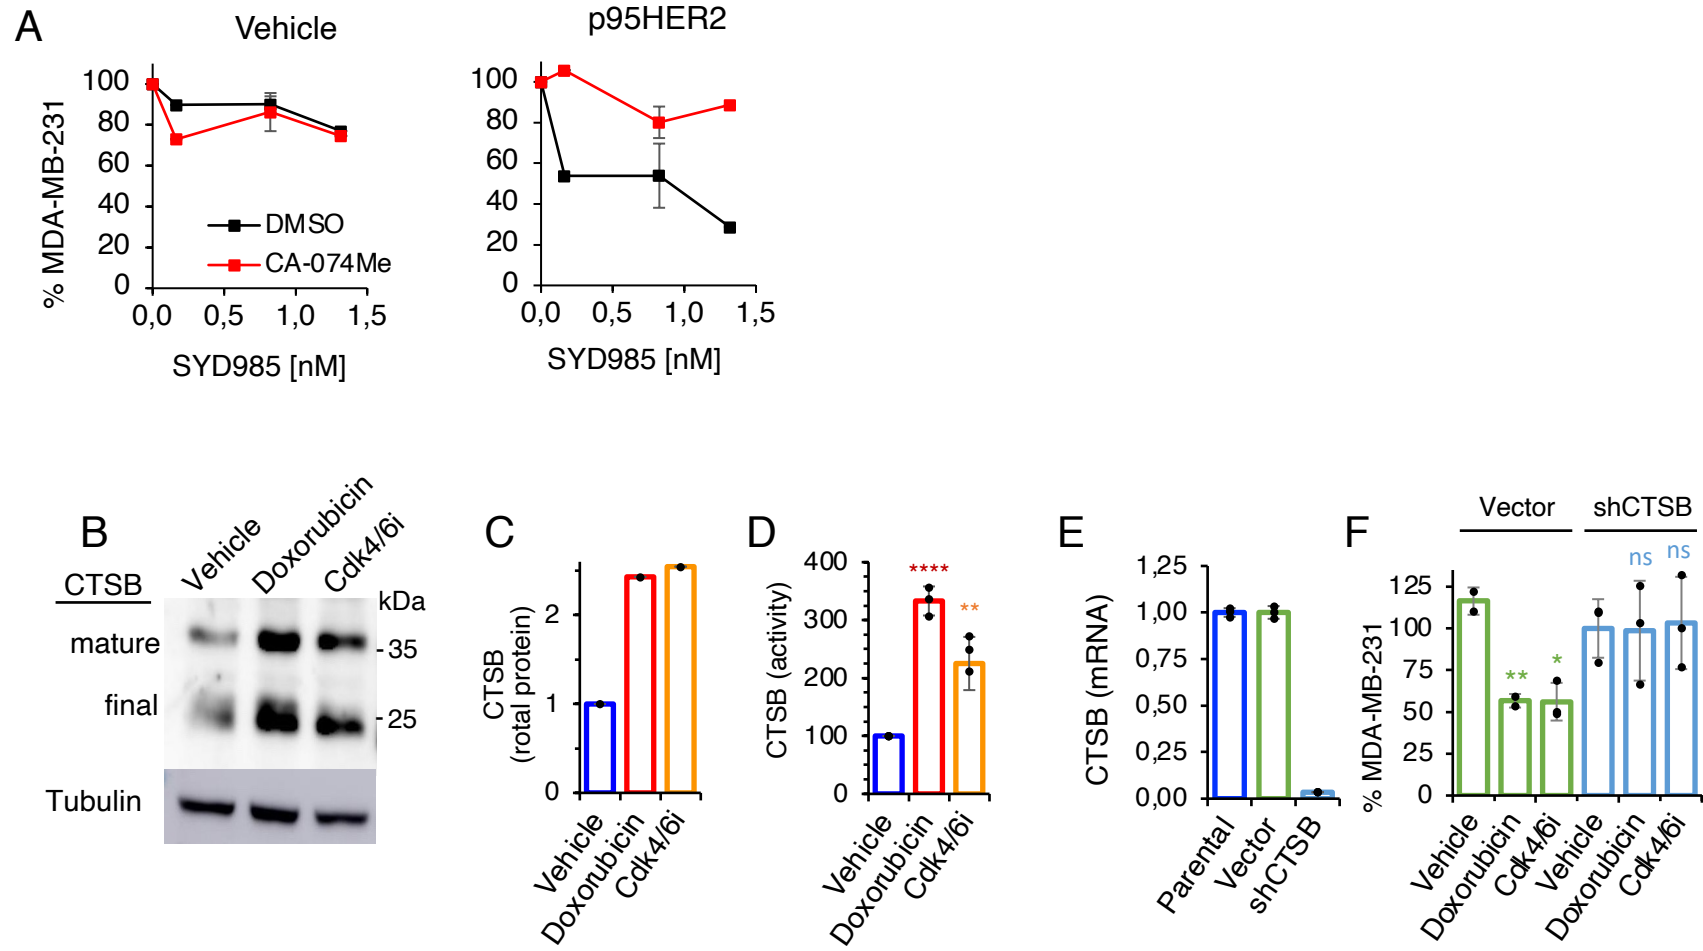

Supplementary Fig. S5

Supplement: can-22-0787_supplementary_figure_s5_suppsf5.pdf [file can-22-0787_supplementary_figure_s5_suppsf5.pdf]

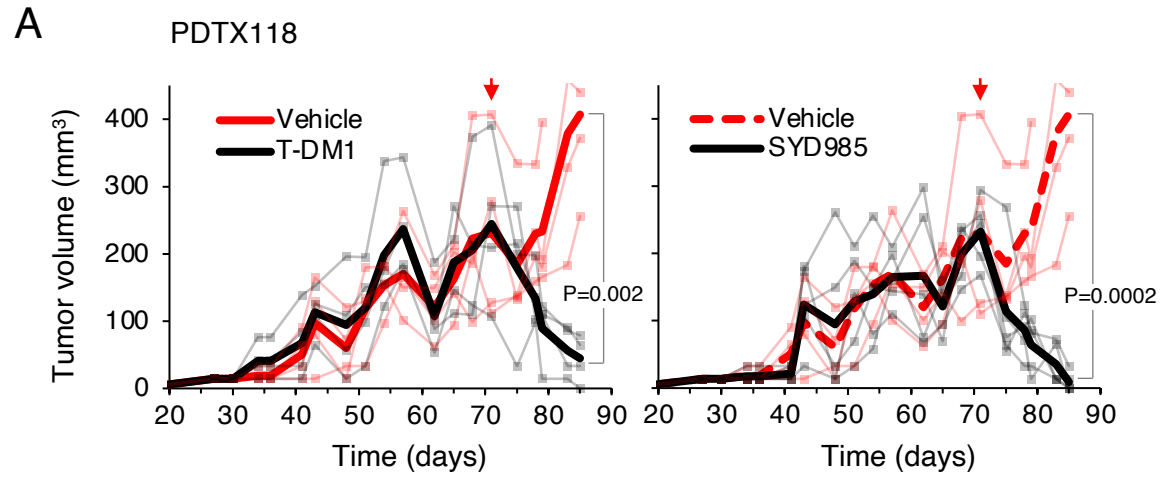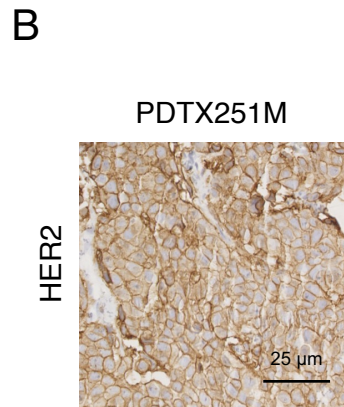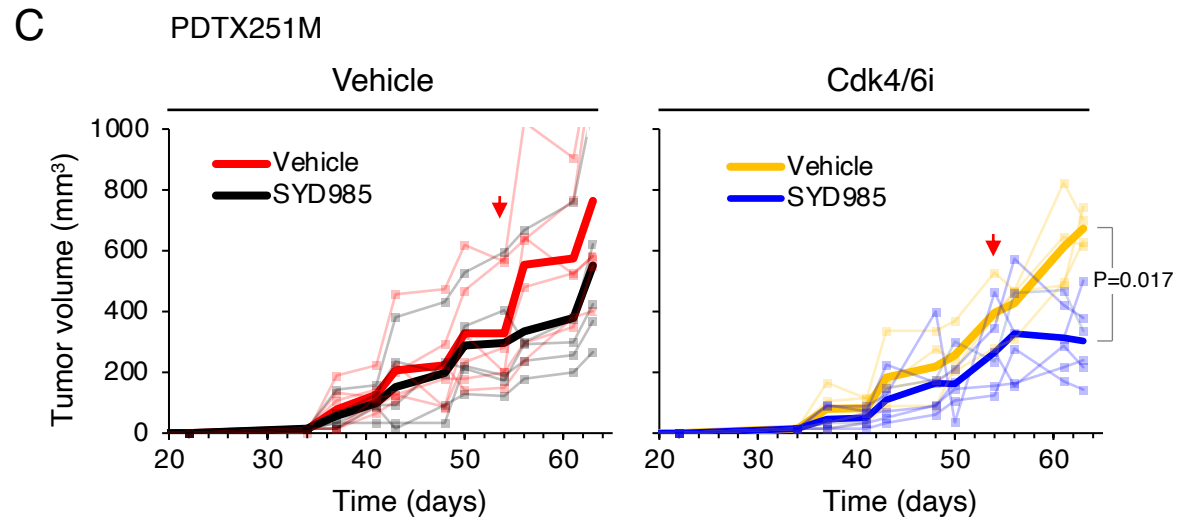

Supplement: can-22-0787_supplementary_figure_s6_suppsf6.pdf [file can-22-0787_supplementary_figure_s6_suppsf6.pdf]
